# Supplementary material
Source: HighWire-hosted journal article supplement (http://www.jrheum.org/highwire/filestream/29721/field_highwire_adjunct_files/0/141630_DataSuppl.pdf)
Supplement: 141630_DataSuppl.pdf [file 141630_DataSuppl.pdf]

Supplementary Tables 1–5: Physician-centered outcomes.

Table 1. Degree of arthritis activity at Week 0 and Week 12.

|                      | 40 mg (n = 49) |          | 80 mg (n = 48) |          |
|----------------------|----------------|----------|----------------|----------|
| Arthritis activity   | Week 0         | Week 12  | Week 0         | Week 12  |
| - none; N (%)        | 0 (0%)         | 24 (59%) | 0 (0%)         | 26 (63%) |
| - mild; N (%)        | 10 (20%)       | 11 (27%) | 11 (23%)       | 10 (24%) |
| - moderate; N (%)    | 21 (43%)       | 5 (12%)  | 21 (44%)       | 3 (7%)   |
| - active; N (%)      | 14 (29%)       | 1 (2%)   | 15 (31%)       | 1 (2%)   |
| - very active; N (%) | 4 (8%)         | 0 (0%)   | 1 (2%)         | 1 (2%)   |
| Missing data; N      |                | 8        |                | 7        |

Table 2. Presence of swelling at Week 0 and Week 12.

|                  | 40 mg (n = 49) |          | 80 mg (n = 48) |          |
|------------------|----------------|----------|----------------|----------|
| Swelling         | Week 0         | Week 12  | Week 0         | Week 12  |
| - present; N (%) | 48 (98%)       | 15 (37%) | 42 (88%)       | 13 (32%) |
| - absent; N (%)  | 1 (2%)         | 26 (63%) | 6 (13%)        | 28 (68%) |
| Missing data; N  |                | 8        |                | 7        |

Table 3. Presence of functional limitation at Week 0 and Week 12.

|                       | 40 mg (n = 49) |          | 80 mg (n = 48) |          |
|-----------------------|----------------|----------|----------------|----------|
| Functional limitation | Week 0         | Week 12  | Week 0         | Week 12  |
| - present; N (%)      | 13 (29%)       | 5 (12%)  | 7 (15%)        | 6 (15%)  |
| - absent; N (%)       | 32 (71%)       | 36 (88%) | 39 (85%)       | 35 (85%) |
| Missing data; N       | 4              | 8        | 2              | 7        |

Table 4. Change of swelling from Week 0 through Week 12; N (%).

|                            | 40 mg (n = 49) |  | 80 mg (n = 48) |  |
|----------------------------|----------------|--|----------------|--|
| Week 0: swelling present   |                |  |                |  |
| - improvement <sup>1</sup> | 25 (63%)       |  | 24 (67%)       |  |
| - no change                | 15 (38%)       |  | 12 (33%)       |  |
| Week 0: swelling absent    |                |  |                |  |
| - no change                | 1 (100%)       |  | 4 (80%)        |  |
| - worsening <sup>2</sup>   | 0 (0%)         |  | 1 (20%)        |  |
| Missing data; N            | 8              |  | 7              |  |

<sup>1</sup> Absence of swelling at Week 12

<sup>2</sup> Presence of swelling at Week 12

Table 5. Change of functional limitation from Week 0 through Week 12; N (%).

|                                      | 40 mg (n = 49) |  | 80 mg (n = 48) |  |
|--------------------------------------|----------------|--|----------------|--|
| Week 0: extension limitation present |                |  |                |  |
| - improvement <sup>1</sup>           | 7 (70%)        |  | 3 (60%)        |  |
| - no change                          | 3 (30%)        |  | 2 (40%)        |  |
| Week 0: extension limitation absent  |                |  |                |  |
| - no change                          | 26 (93%)       |  | 30 (88%)       |  |
| - worsening <sup>2</sup>             | 2 (7%)         |  | 4 (12%)        |  |
| Missing data; N                      | 11             |  | 9              |  |

<sup>1</sup> Absence of functional limitation at Week 12

<sup>2</sup> Presence of functional limitation at Week 12
